# Supplementary material for: Cross-Talks between Raf Kinase Inhibitor Protein and Programmed Cell Death Ligand 1 Expressions in Cancer: Role in Immune Evasion and Therapeutic Implications
Source: MDPI journal article supplement (doi:10.3390/cells13100864), 2024-05-17
Supplement: s1 [file s1]

| Transcription Factors/ Motif For RKIP  | chromosome | Start     | Stop      | BBLS     | BLS      | Z-score  |
|----------------------------------------|------------|-----------|-----------|----------|----------|----------|
| HMG IY                                 | chr12      | 118569963 | 118569970 | 2.753038 | 3.575322 | 3.747332 |
| IRF-1                                  | chr12      | 118574973 | 118574980 | 2.183653 | 3.092408 | 3.828954 |
| LEF1                                   | chr12      | 118575469 | 118575475 | 2.539901 | 3.018820 | 3.808140 |
| MAFA                                   | chr12      | 118574979 | 118574986 | 2.171181 | 3.144143 | 4.040388 |
| MZF1                                   | chr12      | 118574243 | 118574250 | 2.644240 | 3.393019 | 4.162756 |
| Transcription Factors/ Motif For PD-L1 | chromosome | Start     | Stop      | BBLS     | BLS      | Z-score  |
| HMG IY                                 | chr9       | 5447860   | 5447867   | 2.206903 | 2.235073 | 3.747332 |
| IRF-1                                  | chr9       | 5450334   | 5450341   | 3.131315 | 3.588257 | 3.828954 |
| LEF1                                   | chr9       | 5449945   | 5449951   | 3.041352 | 3.425722 | 3.808140 |
| MAFA                                   | chr9       | 5450056   | 5450063   | 1.885646 | 3.446501 | 4.040388 |
| MZF1                                   | chr9       | 5448402   | 5448409   | 1.944854 | 3.066747 | 4.162756 |

**Supplementary Table 1: Similar motifs present on RKIP and PD-L1.** This table provides the locations and starting/ending position in bp from the transcription start site (TSS) of the target gene or the closest gene. In addition, relative BBLS, BLS and Z-scores are provided. Z-score is the main indicator of the strength of predicted binding. It is specific to the binding motif (in PWM form) and the target sequence of the exact site. BBLS (Bayesian Branch Length Score), which is a measure of the conservation of the binding site – a score of 1 is significant while 4 is very strongly conserved.
